# Supplementary material for: Oligomeric epoxide–amine adducts based on 2-amino-N-isopropylacetamide and α-amino-ε-caprolactam: Solubility in presence of cyclodextrin and curing properties
Source: PubMed Central journal article supplement (PMC3869348; doi:10.3762/bjoc.9.315), 2013-12-05
Supplement: Beilstein_J_Org_Chem-09-2803-s001.pdf [file Beilstein_J_Org_Chem-09-2803-s001.pdf]

## Supporting Information

for

# Oligomeric epoxide–amine adducts based on 2-amino-*N*-isopropylacetamide and $\alpha$ -amino- $\epsilon$ -caprolactam: Solubility in presence of cyclodextrin and curing properties

Julian Fischer<sup>1</sup> and Helmut Ritter\*<sup>1</sup>

Address: <sup>1</sup>Institute of Organic Chemistry and Macromolecular Chemistry, Heinrich-Heine-University Düsseldorf, Universitätsstraße 1, D-40225 Düsseldorf, Germany

Email: Helmut Ritter - h.ritter@uni-duesseldorf.de

\*Corresponding author

## Additional <sup>1</sup>H-<sup>1</sup>H-ROESY spectra, FTIR spectra and DLS data

### Content:

- <sup>1</sup>H-<sup>1</sup>H-ROESY of oligomer **9** in presence of RAMEB-CD
- <sup>1</sup>H-<sup>1</sup>H-ROESY of oligomer **10** in presence of RAMEB-CD
- Extended FTIR analysis of the curing of **5** and **8**
- FTIR analysis of the curing of **7** and **8**
- Determination of the hydrodynamic diameter of **9**
- Determination of the hydrodynamic diameter of **10**
- Hysteretic effect of **10** in aqueous RAMEB-CD solution

**$^1\text{H}$ - $^1\text{H}$ -ROESY of oligomer **9** in presence of RAMEB-CD:**

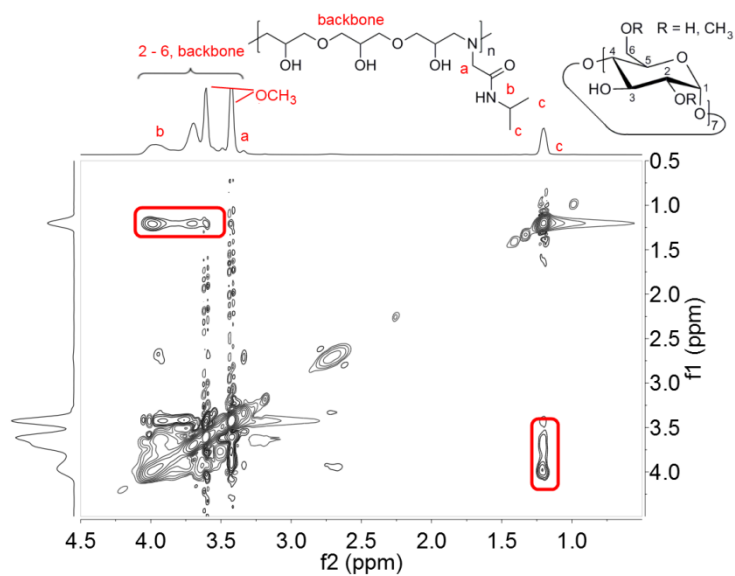

**Figure S1:** 2D NMR ROESY (300 MHz, D<sub>2</sub>O) spectrum of the complex of **9** with RAMEB-CD, displaying the correlation of the protons at 1.1 ppm and the protons in the region of 3.3–4.1 ppm.

**$^1\text{H}$ - $^1\text{H}$ -ROESY of oligomer **10** in presence of RAMEB-CD:**

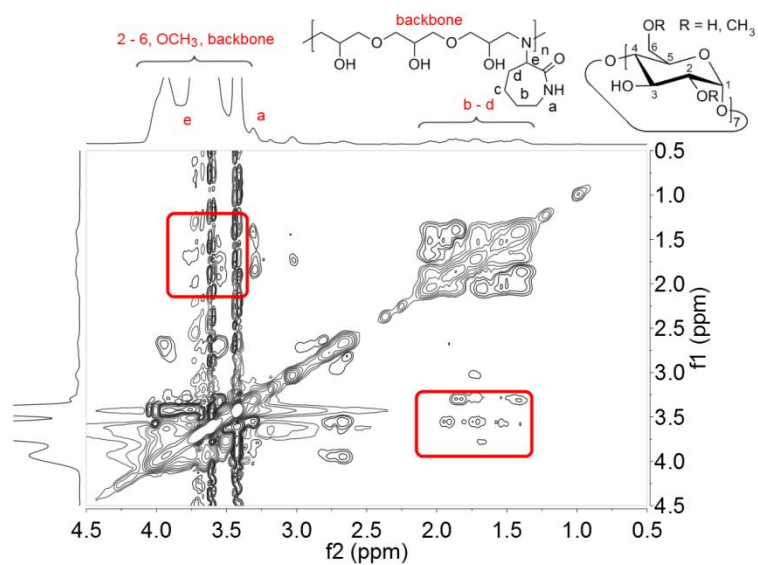

**Figure S2:** 2D NMR ROESY (300 MHz, D<sub>2</sub>O) spectrum of the complex of **10** with RAMEB-CD, displaying the correlation of the protons in the region of 1.1–2.0 ppm and the protons in the region of 3.3–4.1 ppm.

### Extended FTIR analysis of the curing of 5 and 8:

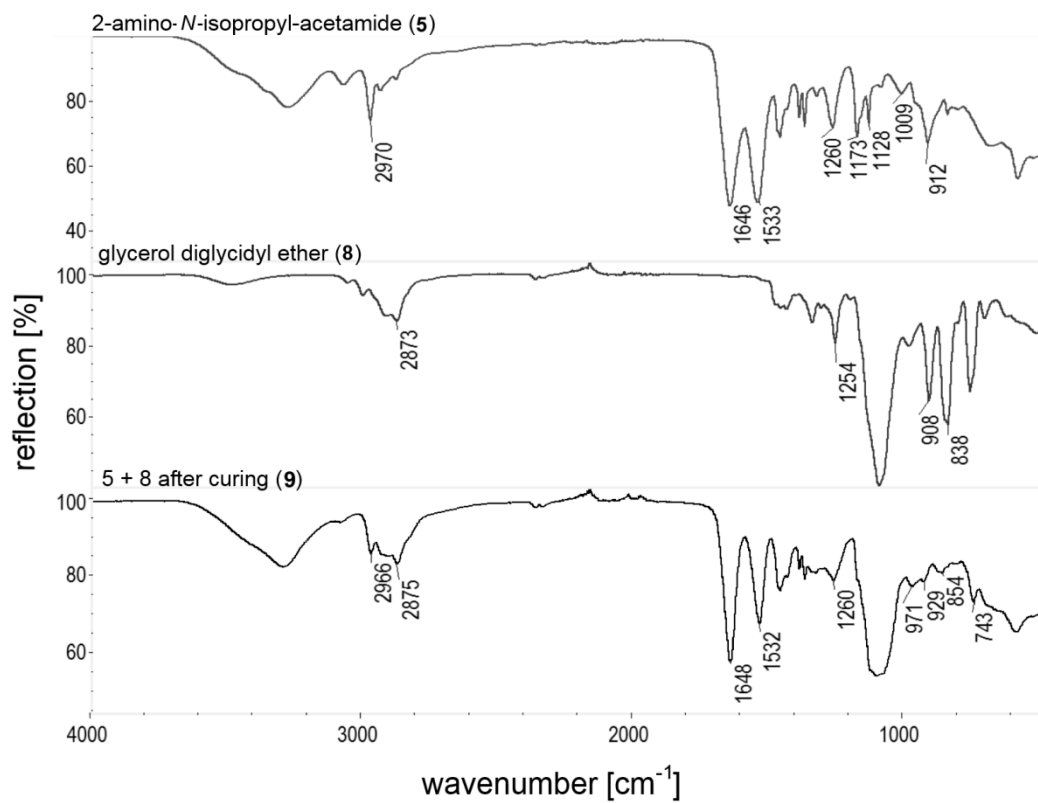

**Figure S3:** Comparison of the FTIR spectra of the monomers **5** and **8**, as well as the resulting adduct **9** after curing.

### FTIR analysis of the curing of 7 and 8:

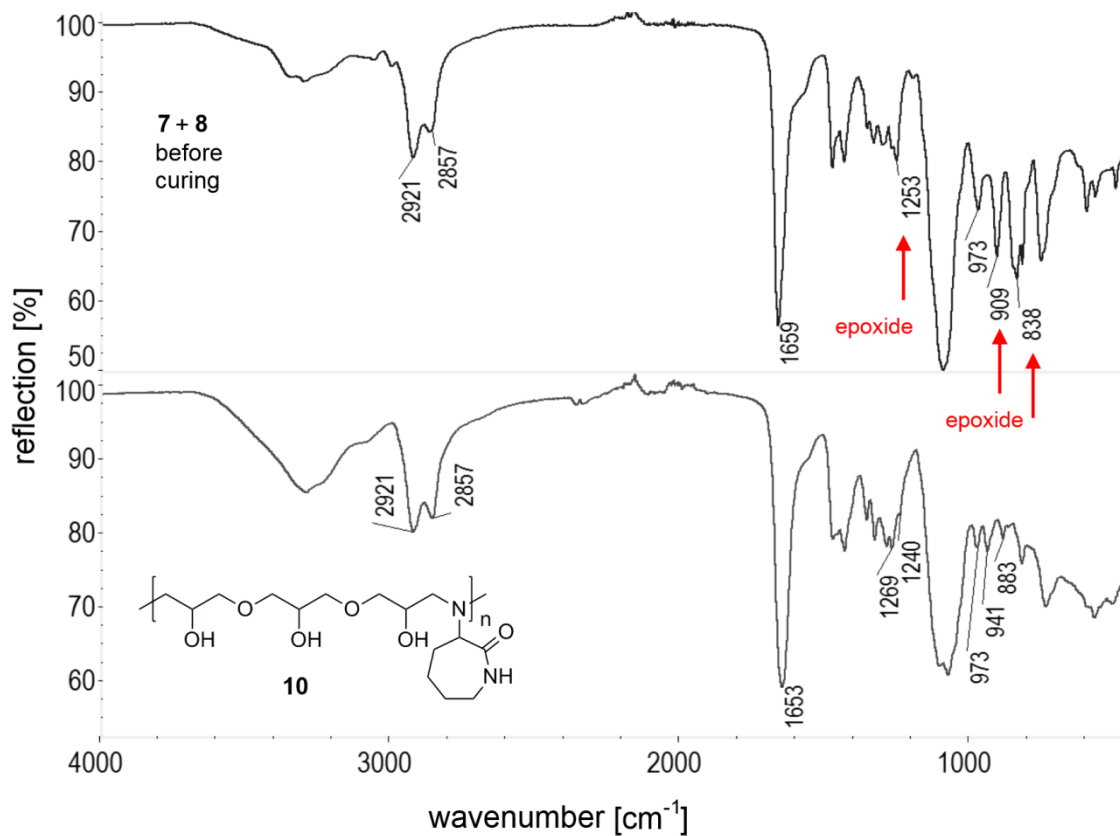

**Figure S4:** Comparison of the FTIR spectra of the monomer mixture of **7** and **8** and the oligomer **10** after curing.

### Determination of the hydrodynamic diameter of **9**:

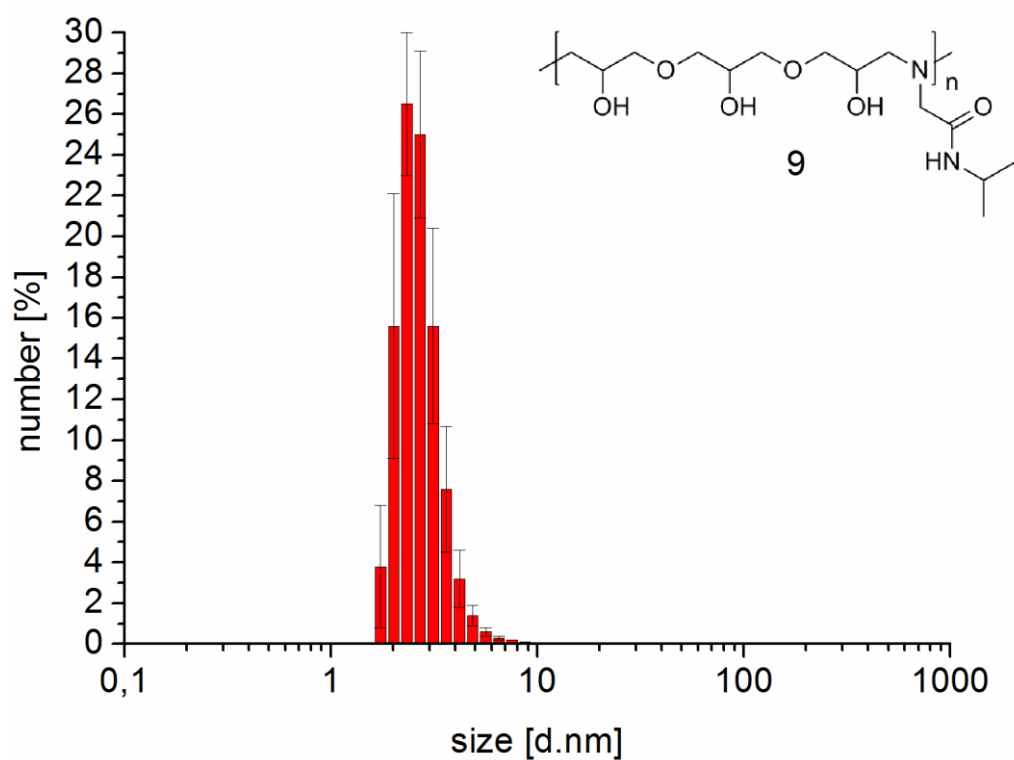

**Figure S5:** Mean hydrodynamic diameters of **9** in water (1.5 mg/mL) at 20 °C and standard deviation error bars.

Determination of the hydrodynamic diameter of **10**:

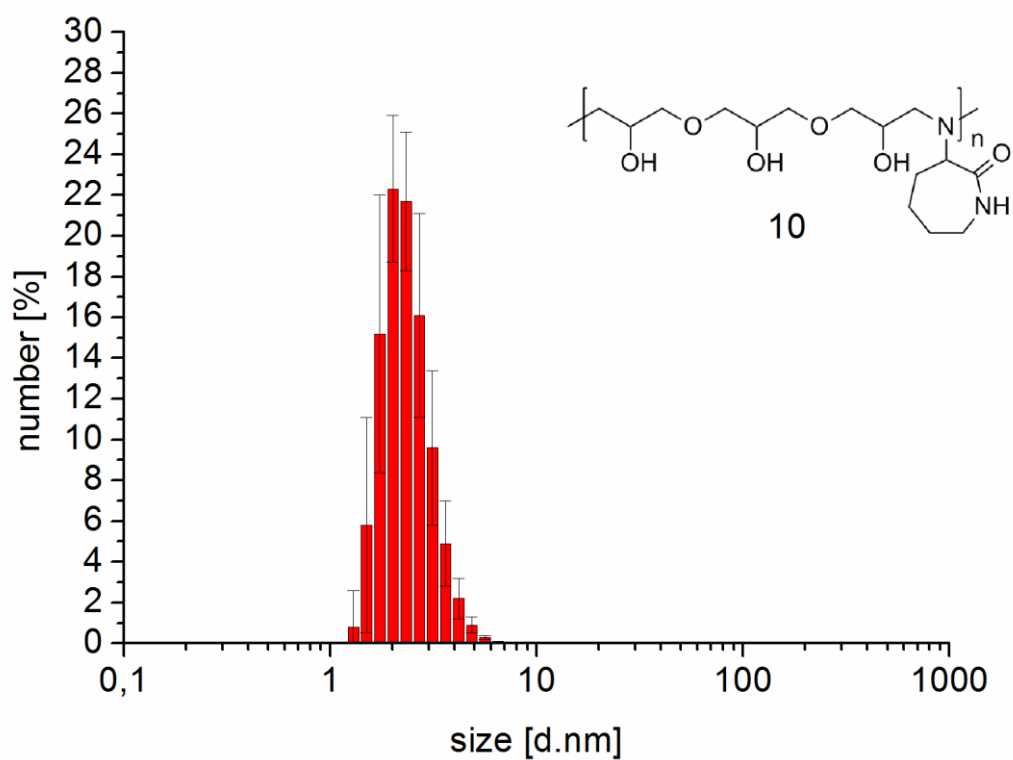

**Figure S6:** Mean hydrodynamic diameters of **10** in water (1.5 mg/mL) at 20 °C and standard deviation error bars.

### Hysteretic effect of **10** in aqueous RAMEB-CD solution

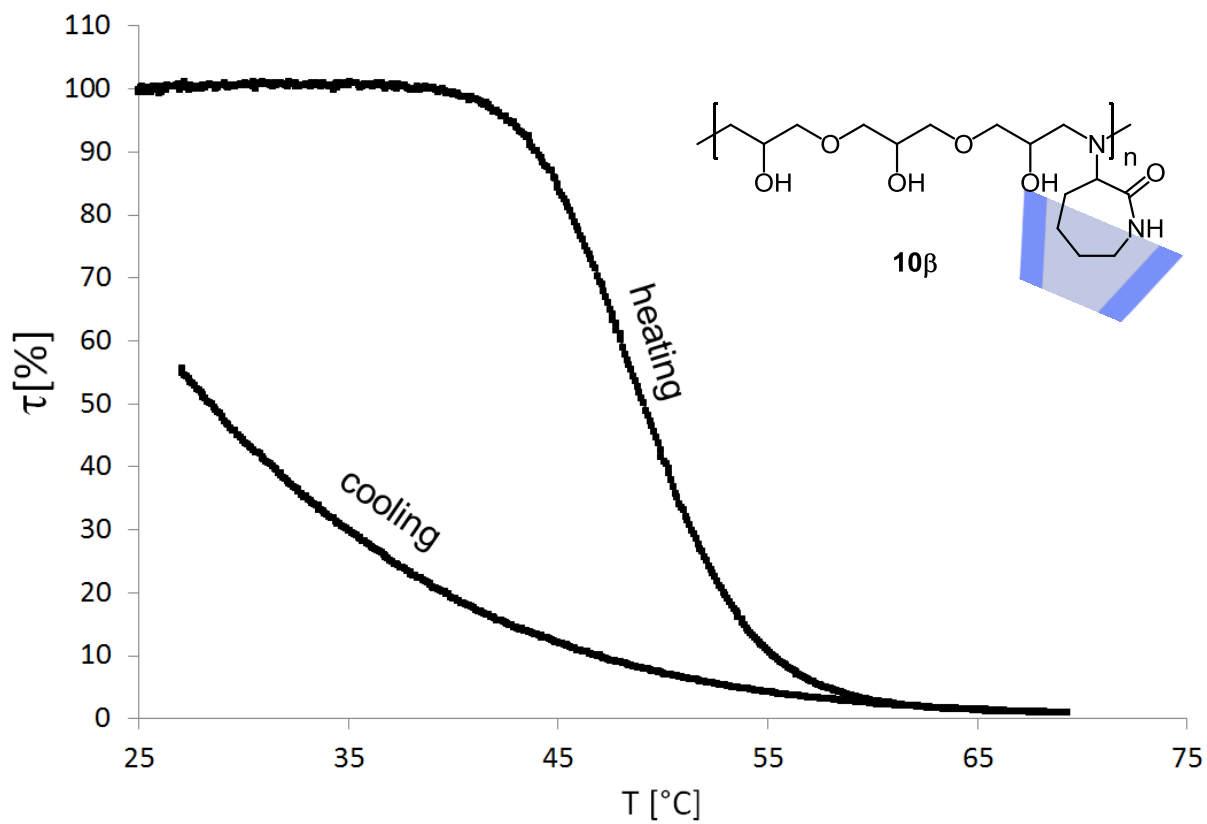

**Figure S7:** LCST measurements of **10** in aqueous RAMEB-CD solution with illustrated heating and cooling curve.
